# Supplementary material
Source: MDPI journal article supplement (https://www.mdpi.com/1999-4907/7/10/213)
Supplement: s1 [file s1]

Supplemental Material：The Alleviation of Nutrient Deficiency Symptoms in Changbai Larch (*Larix olgensis*) Seedlings by the Application of Exogenous Organic Acids

JinFeng Song, Daniel Markewitz,Yong Liu, XingPing Liu and XiaoYang Cui

**Table S1.** Statistical difference results of survival rates of *L. olgensis* seedlings induced by root irrigation and foliar spraying with different concentrations of organic acids and different application periods. Ck is a check treatment of seedlings grown in nutrient rich soil without organic acid treatment. T1 to T9 are treatments of seedlings grown in low nutrient soils treated with 0, 0.2, 1.0, 5.0, and 10.0 mmol·L−1 oxalic acid, and 0.2, 1.0, 5.0, and 10.0 mmol·L−1 citric acid, respectively. Values followed by the same letter for the same parameter are not statistically different at *p* < 0.05 by ANOVA (DUNCAN).

| **Treatments** | **Ck** | **T1** | **T2** | **T3** | **T4** | **T5** | **T6** | **T7** | **T8** | **T9** |
| --- | --- | --- | --- | --- | --- | --- | --- | --- | --- | --- |
| 10d | ab | a | ab | b | cde | cd | c | def | ef | f |
| 20d | a | a | a | b | c | bc | b | c | d | d |
| 30d | a | a | bc | cd | e | e | b | d | f | f |

**Table S2.** Statistical difference results of dry weights of different parts of *L. olgensis* seedlings induced by root irrigation and foliar spraying with different concentrations of organic acids and different application periods. Ck is a check treatment of seedlings grown in nutrient rich soil without organic acid treatment. T1 to T9 are treatments of seedlings grown in low nutrient soils treated with 0, 0.2, 1.0, 5.0, and 10.0 mmol·L−1 oxalic acid, and 0.2, 1.0, 5.0, and 10.0 mmol·L−1 citric acid, respectively. Values followed by the same letter for the same parameter are not statistically different at *p* < 0.05 by ANOVA (DUNCAN).

| **Treatments** | **Ck** | **T1** | **T2** | **T3** | **T4** | **T5** | **T6** | **T7** | **T8** | **T9** |
| --- | --- | --- | --- | --- | --- | --- | --- | --- | --- | --- |
| Leaf 10d | ab | a | a | bc | c | f | d | e | e | f |
| Stem 10d | ab | a | cd | bc | d | e | e | cd | e | f |
| Root 10d | a | a | a | b | c | c | b | c | d | e |
| Leaf 20d | a | a | b | b | e | b | f | cd | c | de |
| Stem 20d | f | b | a | e | d | c | e | d | e | cd |
| Root 20d | a | a | a | a | b | a | a | b | c | c |
| Leaf 30d | g | a | a | b | c | e | c | d | f | f |
| Stem 30d | e | a | a | d | c | b | a | a | a | b |
| Root 30d | d | a | c | a | a | a | c | b | c | c |

**Table S3.** Statistical difference results of Mg, K and Fe contents in roots and leaves of *L. olgensis* seedlings induced by root irrigation and foliar spraying with different concentrations of organic acids and different application periods. Ck is a check treatment of seedlings grown in nutrient rich soil without organic acid treatment. T1 to T9 are treatments of seedlings grown in low nutrient soils treated with 0, 0.2, 1.0, 5.0, and 10.0 mmol·L−1 oxalic acid, and 0.2, 1.0, 5.0, and 10.0 mmol·L−1 citric acid, respectively. Values followed by the same letter for the same parameter are not statistically different at *p* < 0.05 by ANOVA (DUNCAN).

| **Parts** | **Treatments** | **Ck** | **T1** | **T2** | **T3** | **T4** | **T5** | **T6** | **T7** | **T8** | **T9** |
| --- | --- | --- | --- | --- | --- | --- | --- | --- | --- | --- | --- |
| Roots | Mg 10d | c | c | de | e | c | c | d | de | b | a |
| Mg 20d | e | e | e | cd | b | d | e | bc | a | a |
| Mg 30d | de | cd | cd | e | ab | bc | e | cd | ab | a |
| K 10d | g | c | f | e | cd | c | f | de | a | b |
| K 20d | g | d | f | c | c | a | c | e | c | b |
| K 30d | g | f | bc | e | b | a | d | cd | a | d |
| Fe 10d | a | b | c | ef | e | g | d | f | h | i |
| Fe 20d | a | c | b | d | d | c | bc | d | e | f |
| Fe 30d | a | b | c | f | d | f | d | e | e | g |
| Leaves | Mg 10d | d | cd | c | bc | bc | bc | bc | b | a | bc |
| Mg 20d | gh | h | fg | cde | ab | bc | ef | de | bcd | a |
| Mg 30d | e | cde | cde | de | bc | a | cd | cd | ab | ab |
| K 10d | e | b | a | c | c | c | a | a | d | a |
| K 20d | g | cd | e | b | bc | b | d | f | e | a |
| K 30d | e | b | d | cd | a | a | c | d | a | c |
| Fe 10d | a | b | bc | c | ef | gh | d | e | fg | h |
| Fe 20d | a | cd | de | fg | g | ab | cd | abc | ef | bcd |
| Fe 30d | a | abc | ef | f | de | ab | abc | abc | bcd | cd |

**Table S4.** Statistical difference results of MDA contents, SOD activities, proline contents and *Fv/Fm* ratios of *L. olgensis* leaves for seedlings induced by root irrigation and foliar spraying with different concentrations of organic acids and different application periods. Ck is a check treatment of seedlings grown in nutrient rich soil without organic acid treatment. T1 to T9 are treatments of seedlings grown in low nutrient soils treated with 0, 0.2, 1.0, 5.0, and 10.0 mmol·L−1 oxalic acid, and 0.2, 1.0, 5.0, and 10.0 mmol·L−1 citric acid, respectively. Values followed by the same letter for the same parameter are not statistically different at *p* < 0.05 by ANOVA-LSD.

| **Treatments** | **Times** | **Ck** | **T1** | **T2** | **T3** | **T4** | **T5** | **T6** | **T7** | **T8** | **T9** |
| --- | --- | --- | --- | --- | --- | --- | --- | --- | --- | --- | --- |
| MDA contents | 10 days | e | f | d | d | d | b | c | a | a | b |
| 20 days | e | f | f | d | d | b | f | c | a | b |
| 30 days | c | d | c | b | d | a | b | b | b | a |
| SOD activities | 10 days | c | b | f | b | c | d | e | d | g | a |
| 20 days | f | c | e | d | a | i | g | f | h | b |
| 30 days | g | e | f | h | b | a | i | c | f | d |
| Proline contents | 10 days | d | b | c | f | a | i | e | g | h | e |
| 20 days | c | b | d | a | d | g | e | h | f | i |
| 30 days | d | c | a | b | e | e | f | g | h | e |
| *Fv/Fm* ratios | 10 days | bc | a | ab | bc | bc | ef | cd | de | g | f |
| 20 days | c | a | c | b | e | d | c | c | e | f |
| 30 days | b | a | b | b | bc | c | b | bc | c | d |
